# Supplementary figures and images for: Genome-Wide Investigation of Heat Shock Transcription Factor Family in Wheat (Triticum aestivum L.) and Possible Roles in Anther Development
Source: MDPI journal article supplement (doi:10.3390/ijms21020608), 2020-01-17

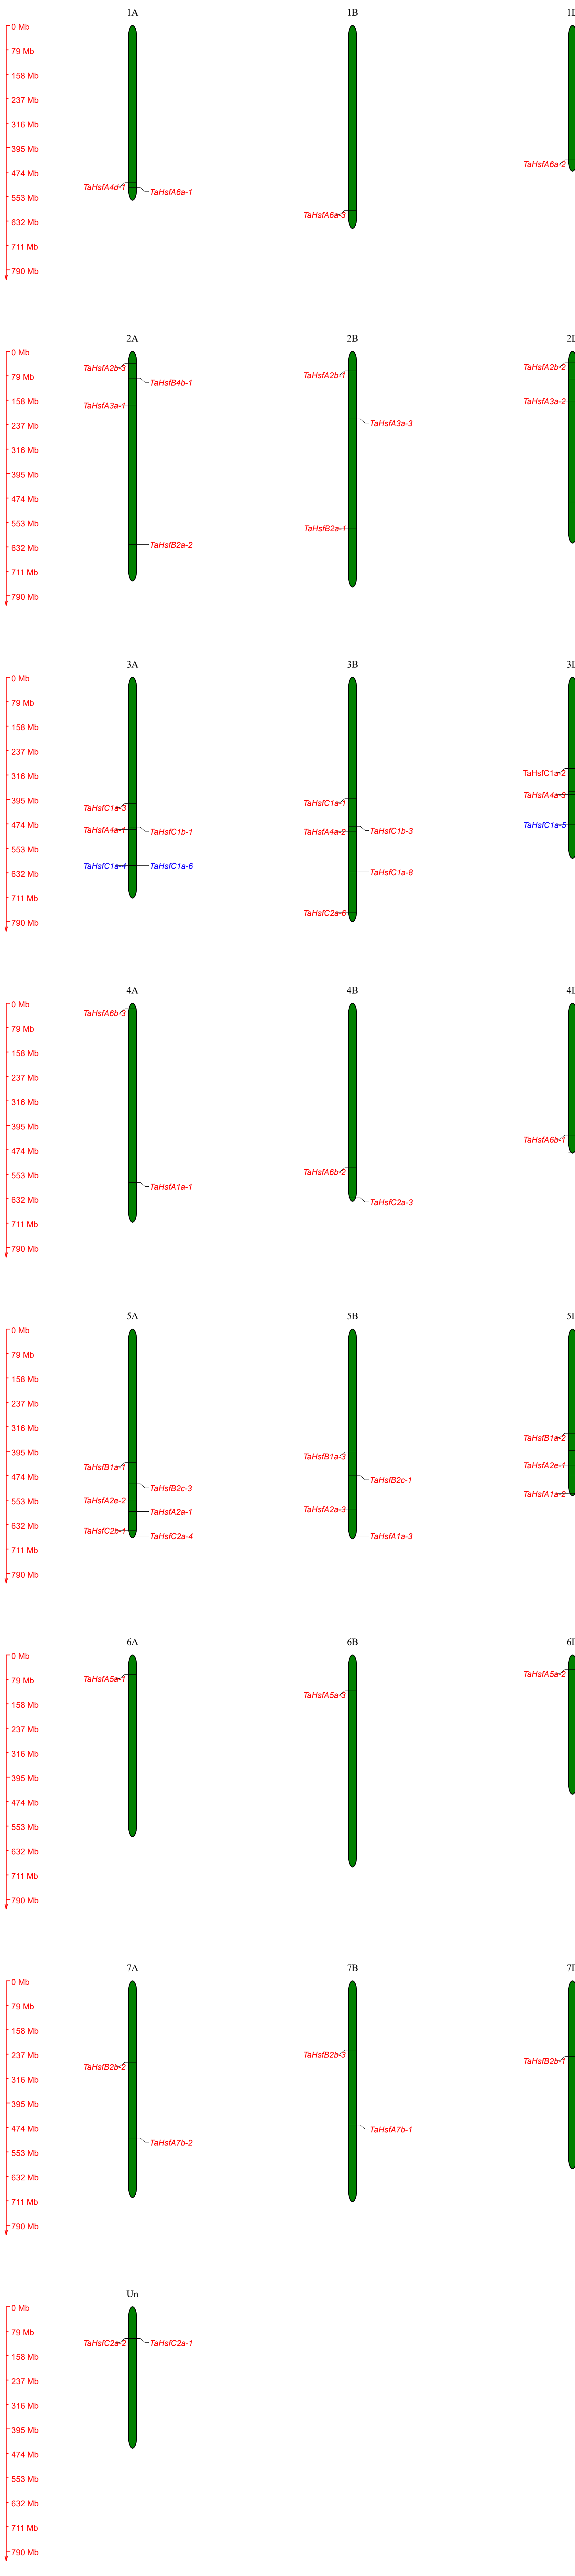

Supplement: s1 [file s1]

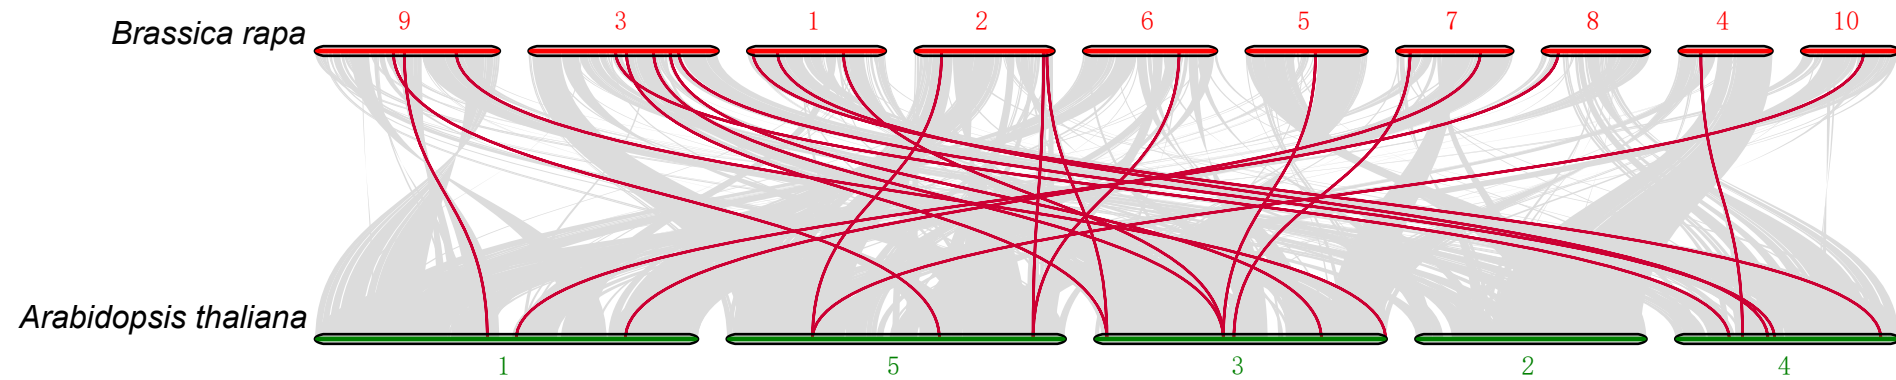

Supplement: s1 [file s1]
